# Supplementary material
Source: PubMed Central journal article supplement (PMC5338404)
Supplement: pnas.1613193114.sapp.pdf [file pnas.1613193114.sapp.pdf]

# SI: Climate is projected to have severe impacts on the frequency and intensity of peak electricity demand across the United States

Maximilian Auffhammer, Patrick Baylis, and Catherine Hausman

November 7, 2016

This document contains supplementary information to Auffhammer, Baylis, and Hausman (2016). Section 1 shows additional figures. Figure S1 shows the geographic extent of our sample, with different zones shown in different colors. Coverage gaps are described in the main text. Figure S2 shows the projected change in the intensity of peak load under RCP4.5, for comparison with Figure 3 (RCP8.5) in the main text. Figures S3 and S4 display the average and peak temperature response functions for each individual zone, for comparison with Figure 1 in the main text. In general, peak responses (red) are larger than average load responses (blue). Moreover, a U-shape, with heating demands for low temperatures and cooling demands for high temperatures, can be seen in all zones. Finally, the appropriateness of imposing a linear response function for high temperatures (described in the text) can be seen in these zone-level figures. Section 2 examines the sensitivity of the results to recession effects. Section 3 describes the compilation of the energy consumption data sources, with zone-level maps for each data source shown in Figures S5-S8.

# 1 Supplemental figures

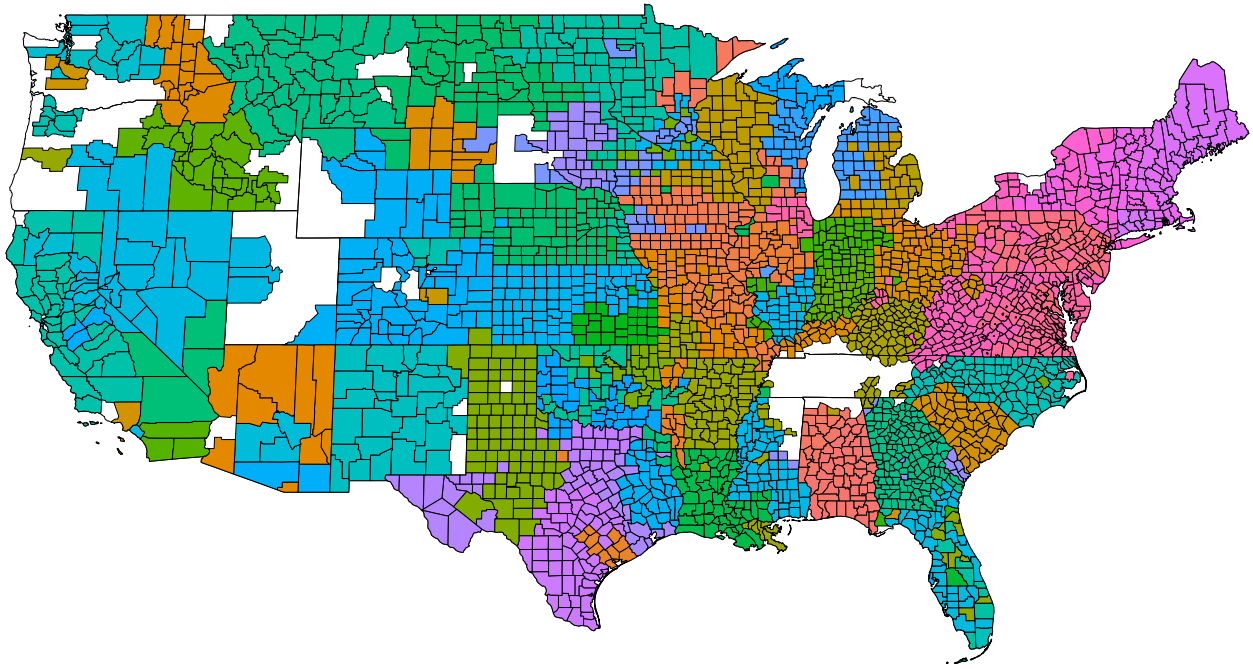

Figure S1: Map of sample

**Notes:** This map shows the geographic extent of our sample, with zones shown in different colors. Coverage gaps are described in the main text.

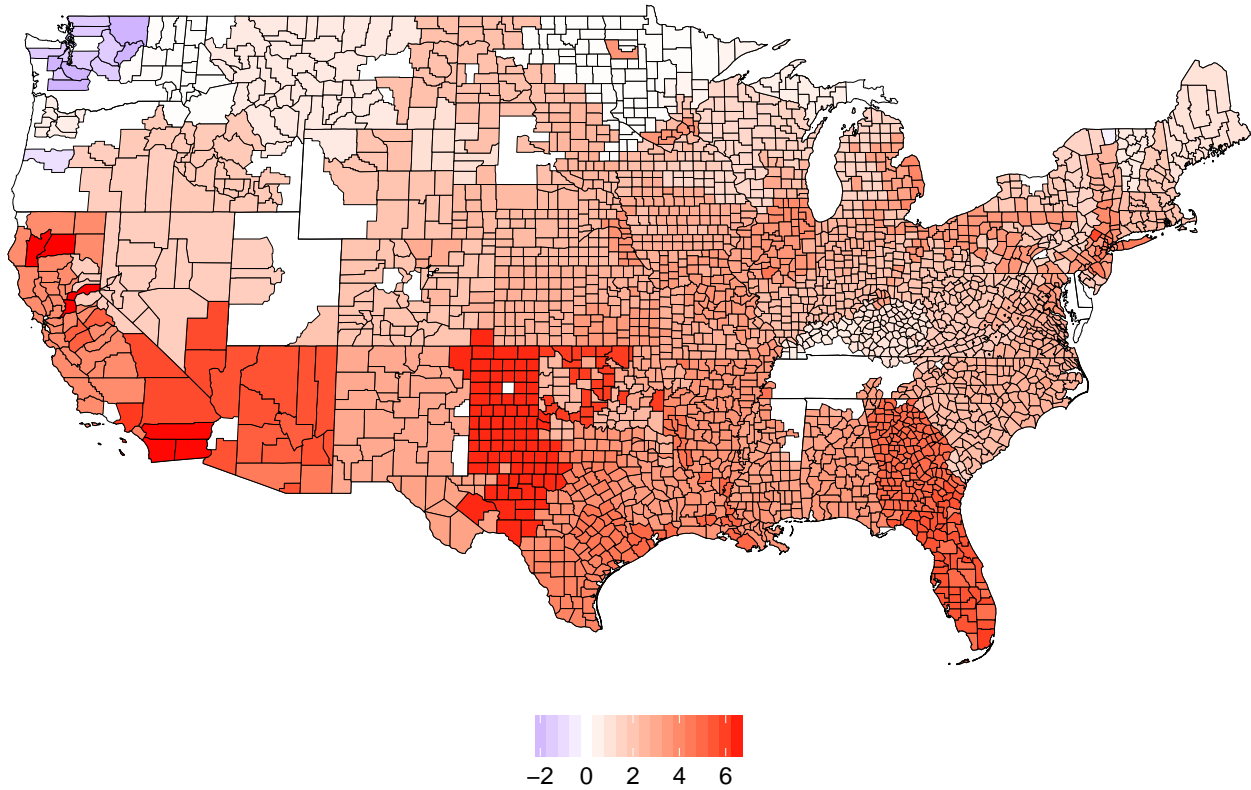

Figure S2: Projected change in intensity of peak load (RCP4.5)

**Notes:** Map depicts the projected change in intensity of peak load under RCP4.5, for comparison with the RCP8.5 map provided in the main text (Figure 3). As in Figure 3, the largest increases are in the South and West.

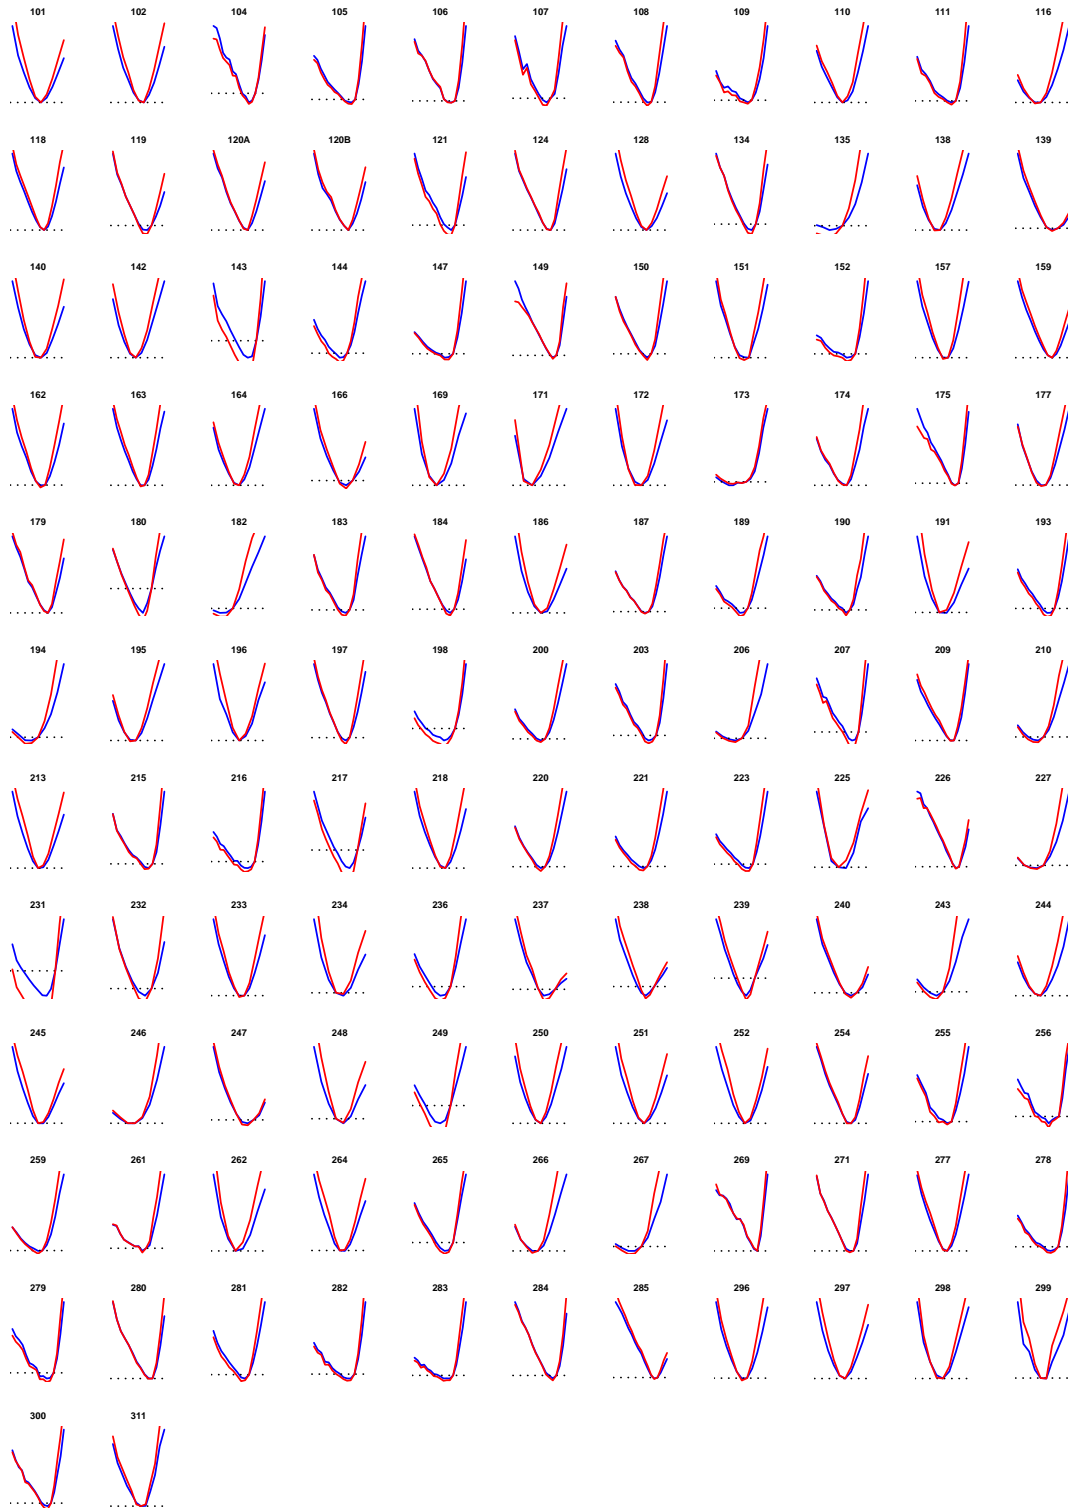

Figure S3: FERC zonal temperature responses

**Notes:** Estimated response functions for each load zone in the FERC data, for comparison with the aggregated results shown in Figure 1. As in Figure 1, the average (total hourly load / 24) and peak (max hourly load) electricity load response to temperature are shown in blue and red, respectively. Regressions control for precipitation, day of week fixed effects, month of year fixed effects, and a 6th-order Chebyshev polynomial in time.

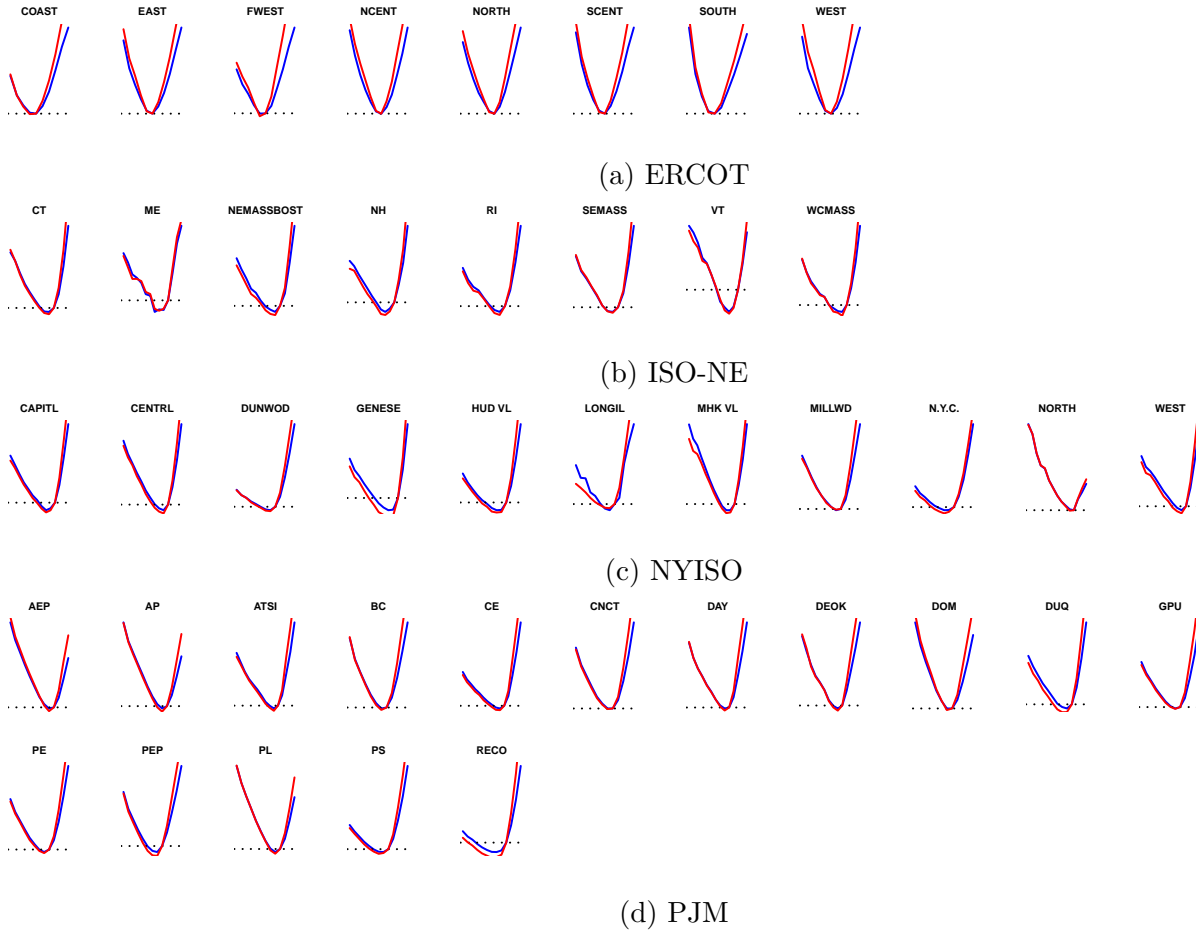

Figure S4: ISO zonal temperature responses

**Notes:** Estimated response functions for each load zone in the ISO data, for comparison with the aggregated results shown in Figure 1. Within each ISO, a separate figure is shown for each zone. As in Figure 1, the average (total hourly load / 24) and peak (max hourly load) electricity load response to temperature are shown in blue and red, respectively. Regressions control for precipitation, day of week fixed effects, month of year fixed effects, and a 6th-order Chebychev polynomial in time.

## 2 Sensitivity of results to recession effects

The following tables document the sensitivity of our predictions of future peak and average demand (Table 1 in main text) to response functions estimated from different time periods within the data. In order to properly compare these estimates, we drop the time polynomial and estimate our statistical models using data from 1) the entire sample, 2) only the recession (December 2007 to June 2009), and 3) not during the recession. Tables 1-3 (4-6) document predictions under RCP 4.5 (RCP 8.5).

### 2.1 RCP 4.5

| <b>RCP 4.5</b> | % $\Delta$ Average<br>Hourly<br>Load | % $\Delta$ Peak<br>Daily<br>Load | % $\Delta$ 95 <sup>th</sup><br>Percentile Daily<br>Peak Load | % $\Delta$ Frequency<br>Days w. Peak Load<br>> current 95 <sup>th</sup> Pctile. | % $\Delta$ Frequency<br>Days w. Peak Load<br>> current 99 <sup>th</sup> Pctile. |
|----------------|--------------------------------------|----------------------------------|--------------------------------------------------------------|---------------------------------------------------------------------------------|---------------------------------------------------------------------------------|
| FERC           | 2.8                                  | 3.5                              | 6.9                                                          | 168                                                                             | 409                                                                             |
| ERCOT          | 3.7                                  | 4.3                              | 6.5                                                          | 178                                                                             | 571                                                                             |
| ISONE          | 1.5                                  | 1.9                              | 7.2                                                          | 107                                                                             | 263                                                                             |
| NYISO          | 3                                    | 3.3                              | 8.6                                                          | 124                                                                             | 332                                                                             |
| PJM            | 2.3                                  | 3.1                              | 8.1                                                          | 131                                                                             | 331                                                                             |
| Total          | 2.8                                  | 3.5                              | 7.1                                                          | 161                                                                             | 402                                                                             |

Table 1: Response of electricity demand to temperature estimated using all data

| <b>RCP 4.5</b> | % $\Delta$ Average<br>Hourly<br>Load | % $\Delta$ Peak<br>Daily<br>Load | % $\Delta$ 95 <sup>th</sup><br>Percentile Daily<br>Peak Load | % $\Delta$ Frequency<br>Days w. Peak Load<br>> current 95 <sup>th</sup> Pctile. | % $\Delta$ Frequency<br>Days w. Peak Load<br>> current 99 <sup>th</sup> Pctile. |
|----------------|--------------------------------------|----------------------------------|--------------------------------------------------------------|---------------------------------------------------------------------------------|---------------------------------------------------------------------------------|
| FERC           | 2.8                                  | 3.5                              | 7.2                                                          | 172                                                                             | 392                                                                             |
| ERCOT          | 3.7                                  | 4.1                              | 6.1                                                          | 186                                                                             | 558                                                                             |
| ISONE          | 1.6                                  | 1.9                              | 6.8                                                          | 96                                                                              | 270                                                                             |
| NYISO          | 2.8                                  | 3.2                              | 8.4                                                          | 123                                                                             | 333                                                                             |
| PJM            | 2.4                                  | 3.2                              | 8.8                                                          | 130                                                                             | 355                                                                             |
| Total          | 2.8                                  | 3.5                              | 7.3                                                          | 165                                                                             | 392                                                                             |

Table 2: Response of electricity demand to temperature estimated using only recession time period

| <b>RCP 4.5</b> | % $\Delta$ Average<br>Hourly<br>Load | % $\Delta$ Peak<br>Daily<br>Load | % $\Delta$ 95 <sup>th</sup><br>Percentile Daily<br>Peak Load | % $\Delta$ Frequency<br>Days w. Peak Load<br>> current 95 <sup>th</sup> Pctile. | % $\Delta$ Frequency<br>Days w. Peak Load<br>> current 99 <sup>th</sup> Pctile. |
|----------------|--------------------------------------|----------------------------------|--------------------------------------------------------------|---------------------------------------------------------------------------------|---------------------------------------------------------------------------------|
| FERC           | 2.8                                  | 3.5                              | 6.8                                                          | 167                                                                             | 408                                                                             |
| ERCOT          | 3.7                                  | 4.3                              | 6.4                                                          | 176                                                                             | 563                                                                             |
| ISONE          | 1.6                                  | 1.9                              | 7.2                                                          | 104                                                                             | 260                                                                             |
| NYISO          | 3                                    | 3.3                              | 8.7                                                          | 125                                                                             | 332                                                                             |
| PJM            | 2.3                                  | 3.1                              | 8.1                                                          | 132                                                                             | 333                                                                             |
| Total          | 2.8                                  | 3.5                              | 7                                                            | 161                                                                             | 401                                                                             |

Table 3: Response of electricity demand to temperature estimated using only non-recession time period

## 2.2 RCP 8.5

| <b>RCP 8.5</b> | % $\Delta$ Average<br>Hourly<br>Load | % $\Delta$ Peak<br>Daily<br>Load | % $\Delta$ 95 <sup>th</sup><br>Percentile Daily<br>Peak Load | % $\Delta$ Frequency<br>Days w. Peak Load<br>> current 95 <sup>th</sup> Pctile. | % $\Delta$ Frequency<br>Days w. Peak Load<br>> current 99 <sup>th</sup> Pctile. |
|----------------|--------------------------------------|----------------------------------|--------------------------------------------------------------|---------------------------------------------------------------------------------|---------------------------------------------------------------------------------|
| FERC           | 8                                    | 9.8                              | 17.4                                                         | 420                                                                             | 1,617                                                                           |
| ERCOT          | 10.1                                 | 11.5                             | 15.7                                                         | 471                                                                             | 2,001                                                                           |
| ISONE          | 4.9                                  | 5.8                              | 17.7                                                         | 282                                                                             | 1,029                                                                           |
| NYISO          | 8.5                                  | 9.2                              | 21.2                                                         | 334                                                                             | 1,247                                                                           |
| PJM            | 7                                    | 8.9                              | 20.4                                                         | 355                                                                             | 1,347                                                                           |
| Total          | 7.9                                  | 9.6                              | 17.8                                                         | 409                                                                             | 1,578                                                                           |

Table 4: Response of electricity demand to temperature estimated using all data

| <b>RCP 8.5</b> | % $\Delta$ Average<br>Hourly<br>Load | % $\Delta$ Peak<br>Daily<br>Load | % $\Delta$ 95 <sup>th</sup><br>Percentile Daily<br>Peak Load | % $\Delta$ Frequency<br>Days w. Peak Load<br>> current 95 <sup>th</sup> Pctile. | % $\Delta$ Frequency<br>Days w. Peak Load<br>> current 99 <sup>th</sup> Pctile. |
|----------------|--------------------------------------|----------------------------------|--------------------------------------------------------------|---------------------------------------------------------------------------------|---------------------------------------------------------------------------------|
| FERC           | 8                                    | 9.7                              | 18                                                           | 411                                                                             | 1,515                                                                           |
| ERCOT          | 9.9                                  | 10.8                             | 14.8                                                         | 452                                                                             | 1,997                                                                           |
| ISONE          | 5.1                                  | 5.8                              | 17.1                                                         | 259                                                                             | 980                                                                             |
| NYISO          | 8.2                                  | 9.1                              | 20.6                                                         | 330                                                                             | 1,214                                                                           |
| PJM            | 7.3                                  | 9.3                              | 22.5                                                         | 351                                                                             | 1,375                                                                           |
| Total          | 7.9                                  | 9.6                              | 18.4                                                         | 400                                                                             | 1,502                                                                           |

Table 5: Response of electricity demand to temperature estimated using only recession time period

| <b>RCP 8.5</b> | % $\Delta$ Average<br>Hourly<br>Load | % $\Delta$ Peak<br>Daily<br>Load | % $\Delta$ 95 <sup>th</sup><br>Percentile Daily<br>Peak Load | % $\Delta$ Frequency<br>Days w. Peak Load<br>> current 95 <sup>th</sup> Pctile. | % $\Delta$ Frequency<br>Days w. Peak Load<br>> current 99 <sup>th</sup> Pctile. |
|----------------|--------------------------------------|----------------------------------|--------------------------------------------------------------|---------------------------------------------------------------------------------|---------------------------------------------------------------------------------|
| FERC           | 7.9                                  | 9.7                              | 17.2                                                         | 422                                                                             | 1,631                                                                           |
| ERCOT          | 10.1                                 | 11.6                             | 15.7                                                         | 471                                                                             | 1,986                                                                           |
| ISONE          | 5                                    | 5.9                              | 17.9                                                         | 281                                                                             | 1,005                                                                           |
| NYISO          | 8.5                                  | 9.3                              | 21.4                                                         | 335                                                                             | 1,244                                                                           |
| PJM            | 7.1                                  | 9                                | 20.5                                                         | 356                                                                             | 1,349                                                                           |
| Total          | 7.9                                  | 9.6                              | 17.7                                                         | 410                                                                             | 1,587                                                                           |

Table 6: Response of electricity demand to temperature estimated using only non-recession time period

### 3 Compilation of energy consumption data

The Federal Energy Regulatory Commission Form 714 (FERC-714) data provide the most geographically disaggregated view into hourly-level U.S. energy demand over the last decade currently available<sup>1</sup>.

The FERC 714 dataset contains hourly reports of energy demand from 186 respondents. These respondents are either:

- An electric utility or group of utilities who operate a balancing authority
- An electric utility or group of utilities who operate a planning area with peak load >200 MW

Note that only utilities operating a planning area are required to file load data. In practice, respondents frequently represent both balancing authorities and planning areas.

To our knowledge, these data are the only source of information on hourly electricity usage that cover the entire United States and are sufficiently disaggregated to provide regional detail. For this reason, they are the best source of knowledge on electricity consumption in the United States.

However, because planning authorities typically do not conform to well-established geographies such as cities, counties, or states, linking these data to meteorological covariates is challenging.

For this project and for the benefit of future research in this area, we undertook the considerable task of linking each respondent to the geographic area served. Our general strategy is to link the FERC respondents with publicly available data on utilities from the Energy Information Administration Form 861 (EIA-861), which does indicate counties served by each utility. The primary challenge is in linking the respondents named in FERC-714 to utilities listed in EIA-861.

First, we limited the original set of 186 respondents by removing the following respondents:

- Respondents whose reporting was completely subsumed by any of the following major ISOs: Electricity Reliability Council of Texas (ERCOT), ISO New England (ISO-NE), PJM, and NYISO. We obtained sub-regional load data from each of the ISOs separately
- Respondents outside of the contiguous United States
- Respondents with <0 kWh total reported load
- Respondents whose entries were internal tests
- Respondents whose data duplicated other FERC-714 respondents

This left 123 respondents for which we required geographic service territory information.

More recent versions of FERC-714 provide a crosswalk from FERC-714 respondent identification numbers to EIA-861 utility identification numbers. For 81 of the respondents, the linked ID corresponded directly to a utility with service territory data in EIA-861. Figure S5 shows the counties covered by these 81 respondents.

---

<sup>1</sup>EIA-930 collects this information for the 67 balancing authorities, but the data date back only to 2015. This presentation has more information on EIA-930.



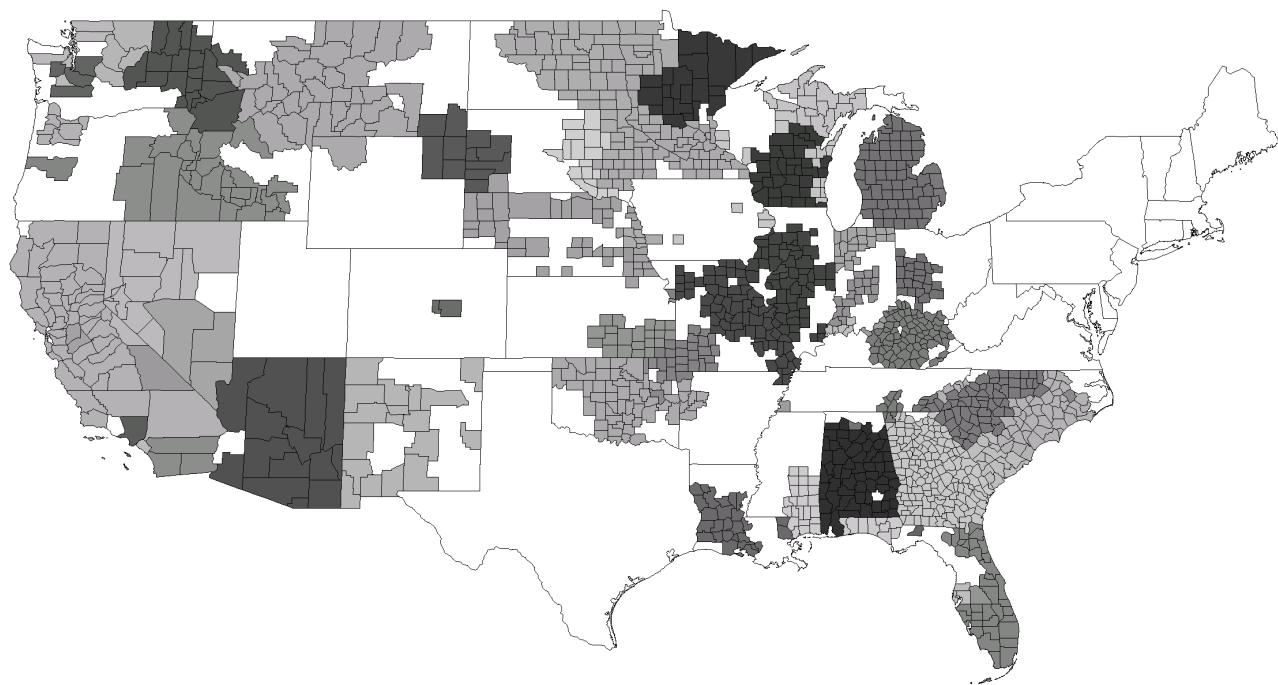

Figure S5: Directly matched territories

The remaining 42 respondents did not have an EIA utility ID that corresponded directly to a service territory. Of these, 29 respondents did have IDs that indicated they served as balancing authorities. Using file1 in EIA-861, we linked these balancing authorities to their constituent utility identification numbers, and obtained the total service territory for each balancing authority. The following map shows the counties covered by these 29 respondents. Because planning authorities (not balancing authorities) were required to report, it is likely that there is some error in the service territory covered. However, manual checks on the service territory of the 29 respondents mapped in this way suggested that the service territories we obtain in this manner correspond closely to their actual territories. Figure S6 is the map for these areas.

Note the overlap between Figures S5 and S6. This is reflective of the reality that many counties are served by more than one balancing authority.

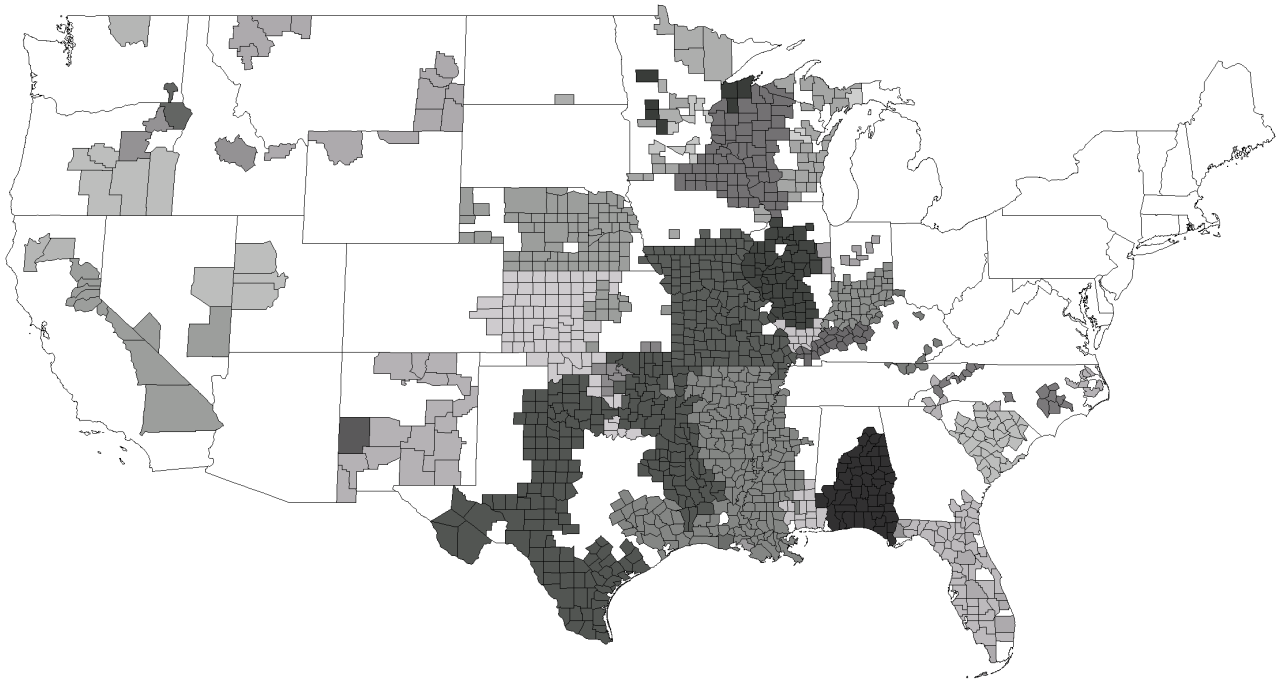

Figure S6: Territories matched to a balancing authority

For the 13 respondents whose service territories we were unable to obtain using their EIA-861 ID directly or as a balancing authorities we loaded the listed utilities from FERC-714 for each respondent and string-matched them to utilities in EIA-861<sup>2</sup>. This produced an extensive set of string-matches and allowed us to obtain service territories for the remaining respondents, mapped below in Figure S7.

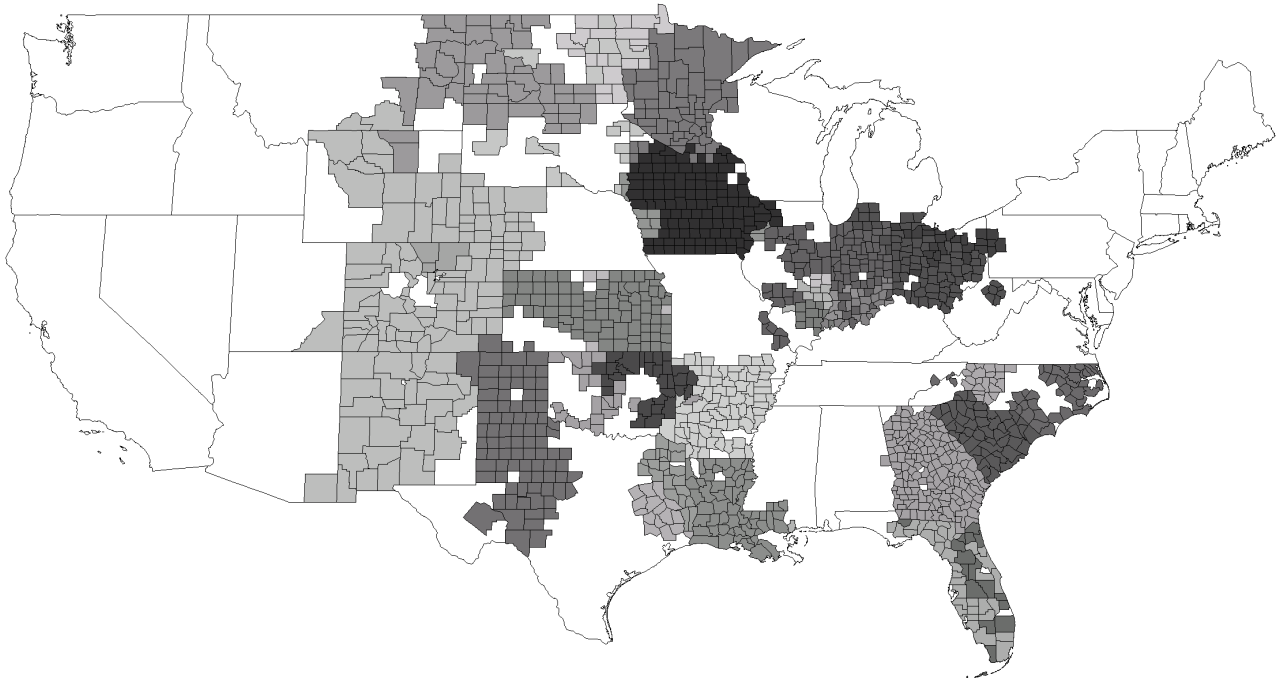

Figure S7: Territories matched manually

---

<sup>2</sup>Prior versions of FERC-714 did not include the FERC-EIA ID crosswalk. As a result, early versions of the project used this string-matching technique for all respondents. This has been deprecated in favor of the more precise procedure described herein.

Table 7 lists all of the respondents in the FERC-714 dataset, if (and why not) they are used in our data, and how they were mapped to a geographic area.

| Respondent ID | Respondent Name                           | In data? | Match type          |
|---------------|-------------------------------------------|----------|---------------------|
| 101           | PowerSouth Energy Cooperative             | TRUE     | Balancing authority |
| 102           | Alabama Power Company                     | TRUE     | Direct match        |
| 103           | Alcoa Power Generating Inc. - Yadkin      | FALSE    | NA                  |
| 104           | Allete                                    | TRUE     | Direct match        |
| 105           | Alliant Energy-East                       | TRUE     | Direct match        |
| 106           | Alliant Energy-West                       | TRUE     | Manual              |
| 107           | Ameren                                    | TRUE     | Direct match        |
| 108           | Ameren Corporation Control Area           | TRUE     | Direct match        |
| 109           | Ameren CILCO                              | TRUE     | Direct match        |
| 110           | American Electric Power Company, Inc.     | TRUE     | Balancing authority |
| 111           | American Municipal Power-Ohio, Inc.       | TRUE     | Manual              |
| 112           | Anchorage Municipal Light & Power         | FALSE    | NA                  |
| 113           | KCP&L Greater Missouri Operations Company | FALSE    | NA                  |
| 114           | Aquila Networks                           | FALSE    | NA                  |
| 115           | Arizona Electric Power Cooperative, Inc.  | FALSE    | NA                  |
| 116           | Arizona Public Service Company            | TRUE     | Direct match        |
| 118           | Associated Electric Cooperative, Inc.     | TRUE     | Balancing authority |
| 119           | Avista Corporation                        | TRUE     | Direct match        |
| 120           | Big Rivers Electric Corporation           | TRUE     | Balancing authority |
| 121           | Black Hills Corporation                   | TRUE     | Direct match        |
| 122           | Bonneville Power Administration, USDOE    | FALSE    | NA                  |
| 123           | Boston Edison Company                     | FALSE    | NA                  |
| 124           | Buckeye Power, Inc.                       | TRUE     | Manual              |
| 125           | California Independent System Operator    | FALSE    | NA                  |
| 126           | Cambridge Electric Light Company          | FALSE    | NA                  |
| 128           | Central Electric Power Cooperative, Inc.  | TRUE     | Manual              |
| 133           | Chugach Electric Association, Inc.        | FALSE    | NA                  |
| 134           | Duke Energy Corp.                         | TRUE     | Manual              |
| 135           | City of Burbank                           | TRUE     | Direct match        |
| 136           | City of Homestead                         | FALSE    | NA                  |
| 137           | City of Independence, MO                  | FALSE    | NA                  |
| 138           | City of Lafayette Utilities System        | TRUE     | Direct match        |
| 139           | City of Tacoma, Dept. of Public Utilities | TRUE     | Direct match        |
| 140           | City of Tallahassee                       | TRUE     | Direct match        |
| 141           | City Utilities of Springfield, MO         | FALSE    | NA                  |
| 142           | Cleco Corporation                         | TRUE     | Direct match        |
| 143           | Colorado Springs Utilities                | TRUE     | Direct match        |
| 144           | Columbia Water & Light                    | TRUE     | Direct match        |
| 145           | Commonwealth Electric Company             | FALSE    | NA                  |
| 146           | Consolidated Edison Co. of NY Inc.        | FALSE    | NA                  |
| 147           | Consumers Energy Company                  | TRUE     | Direct match        |
| 148           | Corn Belt Power Cooperative               | FALSE    | NA                  |
| 149           | Dairyland Power Cooperative               | TRUE     | Balancing authority |
| 150           | Dayton Power & Light Company, The         | TRUE     | Direct match        |
| 151           | Decatur Utilities                         | TRUE     | Direct match        |
| 152           | Detroit Edison Company                    | TRUE     | Direct match        |
| 153           | Duke Energy Control Area Services, LLC    | FALSE    | NA                  |
| 154           | Duke Energy Control Area Services, LLC    | FALSE    | NA                  |
| 155           | Duke Energy Control Area Services, LLC    | FALSE    | NA                  |
| 156           | City of North Little Rock                 | FALSE    | NA                  |
| 157           | Duke Energy Carolinas, LLC                | TRUE     | Direct match        |
| 159           | East Kentucky Power Cooperative           | TRUE     | Direct match        |
| 160           | El Paso Electric Company                  | FALSE    | NA                  |
| 161           | Electric Energy, Inc.                     | FALSE    | NA                  |
| 162           | Electric Power Board of Chattanooga       | TRUE     | Direct match        |
| 163           | Empire District Electric Company          | TRUE     | Direct match        |
| 164           | Entergy Corporation/Services              | TRUE     | Balancing authority |
| 165           | ERCOT                                     | FALSE    | NA                  |
| 166           | Eugene Water & Electric Board             | TRUE     | Direct match        |
| 167           | FirstEnergy Corporation                   | FALSE    | NA                  |
| 169           | Florida Municipal Power Agency            | TRUE     | Manual              |
| 170           | Florida Municipal Power Pool              | FALSE    | NA                  |

Table 7: FERC respondents

---

|     |                                                                    |       |                     |
|-----|--------------------------------------------------------------------|-------|---------------------|
| 171 | Florida Power & Light Company                                      | TRUE  | Direct match        |
| 172 | Gainesville Regional Utilities                                     | TRUE  | Direct match        |
| 173 | Golden Spread Electric Cooperative, Inc.                           | TRUE  | Manual              |
| 174 | Grand River Dam Authority                                          | TRUE  | Direct match        |
| 175 | Great River Energy                                                 | TRUE  | Manual              |
| 176 | Green Mountain Power Corporation                                   | FALSE | NA                  |
| 177 | Greenville Utilities Commission                                    | TRUE  | Direct match        |
| 178 | Hawaiian Electric Company, Inc                                     | FALSE | NA                  |
| 179 | Hoosier Energy REC, Inc.                                           | TRUE  | Balancing authority |
| 180 | Idaho Power Company                                                | TRUE  | Direct match        |
| 182 | Imperial Irrigation District                                       | TRUE  | Direct match        |
| 183 | Indiana Municipal Power Agency                                     | TRUE  | Manual              |
| 184 | Indianapolis Power & Light Company                                 | TRUE  | Direct match        |
| 185 | ISO New England Inc.                                               | FALSE | NA                  |
| 186 | JEA                                                                | TRUE  | Direct match        |
| 187 | Kansas City Board of Public Utilities & Wyandotte County           | TRUE  | Direct match        |
| 188 | Kansas City Power & Light Company                                  | FALSE | NA                  |
| 189 | Kansas Gas & Electric a Westar Energy company                      | TRUE  | Direct match        |
| 190 | Westar Energy                                                      | TRUE  | Manual              |
| 191 | Lakeland Electric                                                  | TRUE  | Direct match        |
| 193 | Lincoln Electric System                                            | TRUE  | Direct match        |
| 194 | Los Angeles Department of Water and Power                          | TRUE  | Direct match        |
| 195 | Louisiana Energy & Power Authority                                 | TRUE  | Balancing authority |
| 196 | Louisiana Generating                                               | TRUE  | Manual              |
| 197 | Louisville Gas & Electric and Kentucky Utilities                   | TRUE  | Direct match        |
| 198 | Madison Gas & Electric Company                                     | TRUE  | Direct match        |
| 199 | Massachusetts Municipal Wholesale                                  | FALSE | NA                  |
| 200 | Memphis Light, Gas and Water                                       | TRUE  | Direct match        |
| 201 | Metropolitan Water District of Southern California                 | FALSE | NA                  |
| 202 | Michigan Electric Power Coordinating Center                        | FALSE | NA                  |
| 203 | MidAmerican Energy Company                                         | TRUE  | Manual              |
| 204 | Mid-Continent Area Power Pool                                      | FALSE | NA                  |
| 206 | Modesto Irrigation District                                        | TRUE  | Direct match        |
| 207 | Montana-Dakota Utilities Company                                   | TRUE  | Manual              |
| 208 | Muscataine Power & Water                                           | FALSE | NA                  |
| 209 | Nebraska Public Power District                                     | TRUE  | Direct match        |
| 210 | Nevada Power Company                                               | TRUE  | Direct match        |
| 211 | New York Independent System Operator, Inc.                         | FALSE | NA                  |
| 212 | New York State Electric & Gas Corporation                          | FALSE | NA                  |
| 213 | Northeast Texas Electric Cooperative                               | TRUE  | Manual              |
| 214 | Northeast Utilities Service Company                                | FALSE | NA                  |
| 215 | Northern Indiana Public Service Company                            | TRUE  | Direct match        |
| 216 | Northern States Power Company                                      | TRUE  | Direct match        |
| 217 | NorthWestern Energy                                                | TRUE  | Direct match        |
| 218 | Oglethorpe Power Company                                           | TRUE  | Manual              |
| 219 | Ohio Valley Electric Corporation & Indiana-Kentucky Electric Corp. | FALSE | NA                  |
| 220 | Oklahoma Gas & Electric Company                                    | TRUE  | Direct match        |
| 221 | Oklahoma Municipal Power Authority                                 | TRUE  | Manual              |
| 222 | Old Dominion Elec. Coop., Inc.-Dom VA Pwr Planning                 | FALSE | NA                  |
| 223 | Omaha Public Power District                                        | TRUE  | Direct match        |
| 224 | Orange & Rockland Utils., Inc.                                     | FALSE | NA                  |
| 225 | Orlando Utilities Commission                                       | TRUE  | Direct match        |
| 226 | Otter Tail Power Company                                           | TRUE  | Direct match        |
| 227 | Pacific Gas and Electric Company                                   | TRUE  | Direct match        |
| 228 | PacifiCorp - East                                                  | FALSE | NA                  |
| 229 | PacifiCorp - West                                                  | FALSE | NA                  |
| 230 | PJM Interconnection LLC                                            | FALSE | NA                  |
| 231 | Platte River Power Authority                                       | TRUE  | Manual              |
| 232 | Portland General Electric Company                                  | TRUE  | Direct match        |
| 233 | Progress Energy                                                    | TRUE  | Direct match        |
| 234 | Progress Energy                                                    | TRUE  | Manual              |
| 235 | Public Service Company of Colorado                                 | FALSE | NA                  |
| 236 | Public Service Company of New Mexico                               | TRUE  | Direct match        |
| 237 | PUD No. 1 of Chelan County                                         | TRUE  | Direct match        |
| 238 | PUD No. 1 of Douglas County                                        | TRUE  | Direct match        |
| 239 | PUD No. 2 of Grant County                                          | TRUE  | Direct match        |
| 240 | Puget Sound Energy, Inc.                                           | TRUE  | Direct match        |
| 241 | Rochester Gas and Electric Corporation                             | FALSE | NA                  |
| 242 | Reedy Creek Improvement District                                   | FALSE | NA                  |
| 243 | Sacramento Municipal Utility District                              | TRUE  | Direct match        |
| 244 | Salt River Project                                                 | TRUE  | Direct match        |
| 245 | Sam Rayburn G&T Electric Coop.                                     | TRUE  | Manual              |
| 246 | San Diego Gas & Electric Company                                   | TRUE  | Direct match        |
| 247 | Seattle City Light                                                 | TRUE  | Direct match        |
| 248 | Seminole Electric Cooperative, Inc.                                | TRUE  | Balancing authority |
| 249 | Sierra Pacific Resources                                           | TRUE  | Direct match        |
| 250 | South Carolina Electric & Gas                                      | TRUE  | Direct match        |

---

---

|       |                                                                                  |       |                     |
|-------|----------------------------------------------------------------------------------|-------|---------------------|
| 251   | South Carolina Public Service Authority                                          | TRUE  | Direct match        |
| 252   | South Mississippi Electric Power Association                                     | TRUE  | Balancing authority |
| 253   | Southern Company                                                                 | FALSE | NA                  |
| 254   | Southern Illinois Power Coop                                                     | TRUE  | Balancing authority |
| 255   | Southern Indiana Gas & Electric Company                                          | TRUE  | Direct match        |
| 256   | Southern Minnesota Municipal Power Agency                                        | TRUE  | Balancing authority |
| 257   | Southwest Power Pool                                                             | FALSE | NA                  |
| 258   | Southwestern Power Administration                                                | FALSE | NA                  |
| 259   | Southwestern Public Service Company                                              | TRUE  | Manual              |
| 260   | Square Butte Electric Coop                                                       | FALSE | NA                  |
| 261   | Sunflower Electric Power Corporation                                             | TRUE  | Balancing authority |
| 262   | Tampa Electric Company                                                           | TRUE  | Direct match        |
| 263   | Tennessee Valley Authority                                                       | FALSE | NA                  |
| 264   | Tex-La Electric Cooperative of Texas, Inc.                                       | TRUE  | Manual              |
| 265   | Tri-State G & T Assn., Inc.                                                      | TRUE  | Manual              |
| 266   | Tucson Electric Power Company                                                    | TRUE  | Direct match        |
| 267   | Turlock Irrigation District                                                      | TRUE  | Direct match        |
| 268   | United Illuminating Company                                                      | FALSE | NA                  |
| 269   | Upper Peninsula Power Company                                                    | TRUE  | Direct match        |
| 271   | Wabash Valley Power Association, Inc.                                            | TRUE  | Manual              |
| 272   | Western Area Power Admin - Upper Missouri-East (Upper Great Plains Region operat | FALSE | NA                  |
| 273   | Western Area Power Administration - Colorado-Missouri Control Area (Rocky Mtn Re | FALSE | NA                  |
| 274   | Western Area Power Administration - Lower Colorado control area (Desert Southwe  | FALSE | NA                  |
| 275   | Western Area Power Administration - Upper Missouri West (Upper Great Plains Regi | FALSE | NA                  |
| 277   | Western Farmers Electric Cooperative                                             | TRUE  | Balancing authority |
| 278   | Wisconsin Electric Power Company                                                 | TRUE  | Direct match        |
| 279   | Wisconsin Public Service Corporation                                             | TRUE  | Direct match        |
| 280   | Wolverine Power Supply Coop., Inc.                                               | TRUE  | Direct match        |
| 281   | City of Springfield                                                              | TRUE  | Direct match        |
| 282   | Wisconsin Public Power Inc.                                                      | TRUE  | Direct match        |
| 283   | Minnesota Municipal Power Agency                                                 | TRUE  | Manual              |
| 284   | Missouri River Energy Services                                                   | TRUE  | Manual              |
| 285   | Minnkota Power Cooperative, Inc.                                                 | TRUE  | Manual              |
| 286   | Gen-Sys Energy                                                                   | FALSE | NA                  |
| 287   | Basin Electric Power Cooperative                                                 | FALSE | NA                  |
| 288   | Batesville Balancing Authority                                                   | FALSE | NA                  |
| 289   | City of Conway                                                                   | FALSE | NA                  |
| 290   | City of Ruston                                                                   | FALSE | NA                  |
| 291   | Union Power Partners                                                             | FALSE | NA                  |
| 292   | City of West Memphis                                                             | FALSE | NA                  |
| 293   | New Harquahala Generating Station                                                | FALSE | NA                  |
| 294   | City of Benton                                                                   | FALSE | NA                  |
| 295   | Old Dominion Elec. Coop., Inc.-Delmarva P&L Planning                             | FALSE | NA                  |
| 296   | Georgia Power Company                                                            | TRUE  | Direct match        |
| 297   | Mississippi Power Company                                                        | TRUE  | Direct match        |
| 298   | Gulf Power Company                                                               | TRUE  | Direct match        |
| 299   | Southern Power Company                                                           | TRUE  | Direct match        |
| 300   | NorthWestern Energy                                                              | TRUE  | Direct match        |
| 301   | PJM Interconnection Eastern Hub                                                  | FALSE | NA                  |
| 302   | PJM Interconnection Western Hub                                                  | FALSE | NA                  |
| 303   | PJM Interconnection Illinois Hub                                                 | FALSE | NA                  |
| 304   | PJM Interconnection North Illinois Hub                                           | FALSE | NA                  |
| 305   | PJM Interconnection Dominion Hub                                                 | FALSE | NA                  |
| 306   | PJM Interconnection AEP-Dayton Hub                                               | FALSE | NA                  |
| 307   | PacifiCorp - Part II Sch 2                                                       | FALSE | NA                  |
| 308   | City of St. Cloud                                                                | FALSE | NA                  |
| 309   | Michigan Electric Powr Coord. Center - Detroit                                   | FALSE | NA                  |
| 310   | Southern California Edison Company                                               | FALSE | NA                  |
| 311   | Arkansas Electric Cooperative Corporation                                        | TRUE  | Manual              |
| 312   | Glacier Wind Balancing Authority                                                 | FALSE | NA                  |
| 313   | Plum Point Energy Associates -SERC REGION                                        | FALSE | NA                  |
| 315   | Griffith Energy                                                                  | FALSE | NA                  |
| 319   | Test Company E                                                                   | FALSE | NA                  |
| 320   | City of Osceola - SERC                                                           | FALSE | NA                  |
| 321   | MISO                                                                             | FALSE | NA                  |
| 322   | Constellation Energy Control and Dispatch - for Brazos                           | FALSE | NA                  |
| 323   | Constellation Energy Control and Dispatch, LLC                                   | FALSE | NA                  |
| 324   | NaturEner Wind Watch, LLC                                                        | FALSE | NA                  |
| 325   | New Smyrna Beach Utilities Commission                                            | FALSE | NA                  |
| 326   | City of Lake Worth                                                               | FALSE | NA                  |
| 327   | City of Vero Beach                                                               | FALSE | NA                  |
| 99991 | {Test Company A}                                                                 | FALSE | NA                  |
| 99992 | {Test Company B}                                                                 | FALSE | NA                  |
| 99994 | {Test Company D-edited}                                                          | FALSE | NA                  |

---

In total, the FERC 714 data resulted in 123 load zones corresponding to 2,377 counties. As stated above, we additionally obtained sub-regional load data from ERCOT, ISO-NE, PJM, and NYISO. Because these ISOs report to FERC as single entities, we instead use the disaggregated load data available on their website. This resulted in 43 load zones corresponding to 869 counties, mapped in Figure S8.

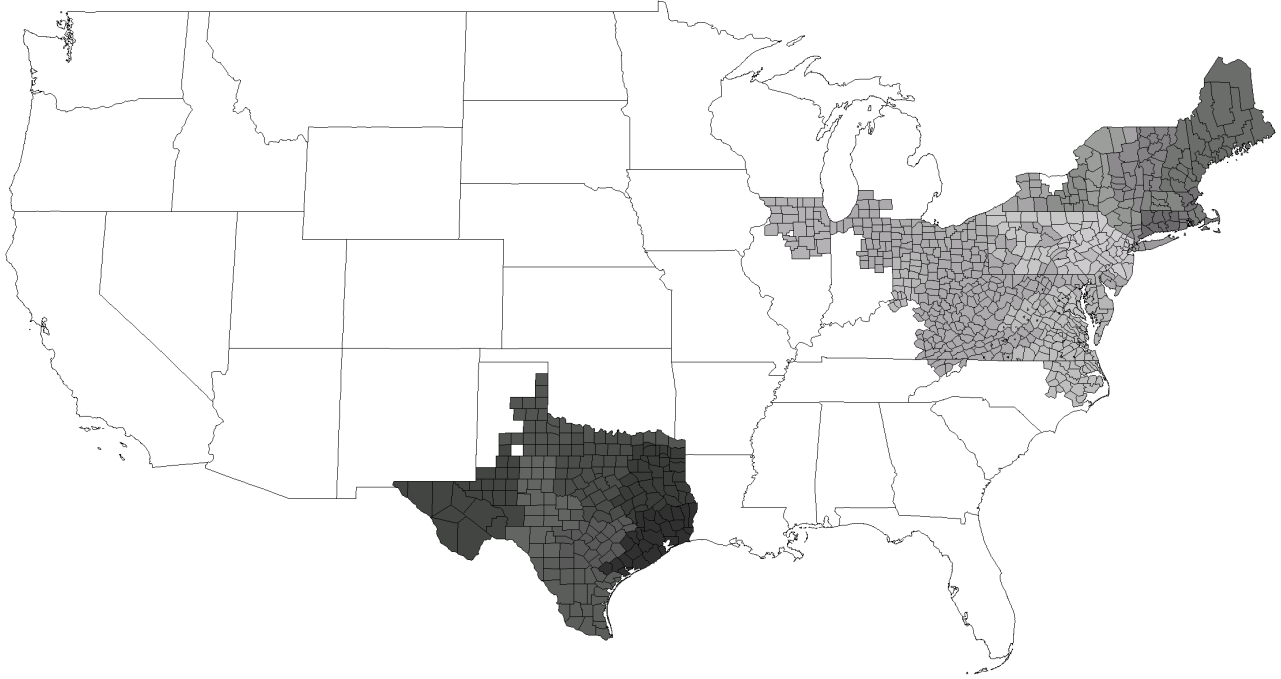

Figure S8: ISO territories

Finally, we compiled the geographies obtained from FERC and from the ISOs into a single dataset. This resulted in 166 load zones covering 2,888 counties. The final coverage map for this dataset is Figure S1.
